# Supplementary material for: Bimetallic zeolitic imidazolate frameworks-derived porous carbon-based materials with efficient synergistic microwave absorption properties: the role of calcining temperature
Source: Royal Society of Chemistry journal article supplement (doi:10.1039/c7ra08882e), 2017-01-01
Supplement: c7ra08882e1.pdf [file c7ra08882e1.pdf]

## Supporting Information

### **Bimetallic zeolitic imidazolate frameworks-derived porous carbon-based materials with efficient synergistic microwave absorption properties: role of calcining temperature**

Suyun Wang<sup>a</sup>, Xiang Ke<sup>a</sup>, Suting Zhong<sup>a</sup>, Yaru Lai<sup>a</sup>, Danlin Qian<sup>a</sup>, Yanping Wang<sup>a</sup>,  
Qinghua Wang<sup>b</sup>, Wei Jiang<sup>\*a</sup>

<sup>a</sup>National Special Superfine Powder Engineering Technology Research Center,  
Nanjing University of Science and Technology, 210094, Nanjing, China.

\* Corresponding author E-mail: superfine\_jw@126.com; Tel: +86-025-8431-5942.

<sup>b</sup>Military Representative Office 763, 030008, Taiyuan, China.

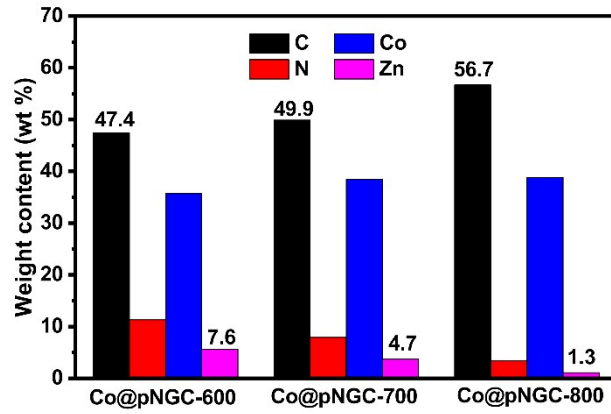

Figure S1. The EDX results of elements weight content in Co@pNGC-600, Co@pNGC-700 and Co@pNGC-800.

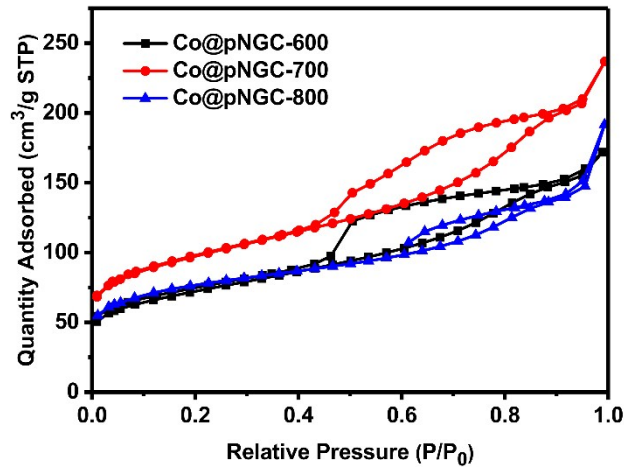

Figure S2. Nitrogen adsorption and desorption isotherms of Co@pNGC-600, Co@pNGC-700 and Co@pNGC-800.

Table S1. The values of saturation magnetization ( $M_s$ ), coercivity ( $H_c$ ) and remant magnetization ( $M_r$ ) for Co@pNGC-600, Co@pNGC- and Co@pNGC-800

| Samples     | $M_s$ (emu/g) | $H_c$ (Oe) | $M_r$ (emu/g) |
|-------------|---------------|------------|---------------|
| Co@pNGC-600 | 20            | 48.7       | 1.8           |
| Co@pNGC-700 | 33.5          | 200.7      | 6.7           |
| Co@pNGC-800 | 35            | 136.3      | 5.6           |

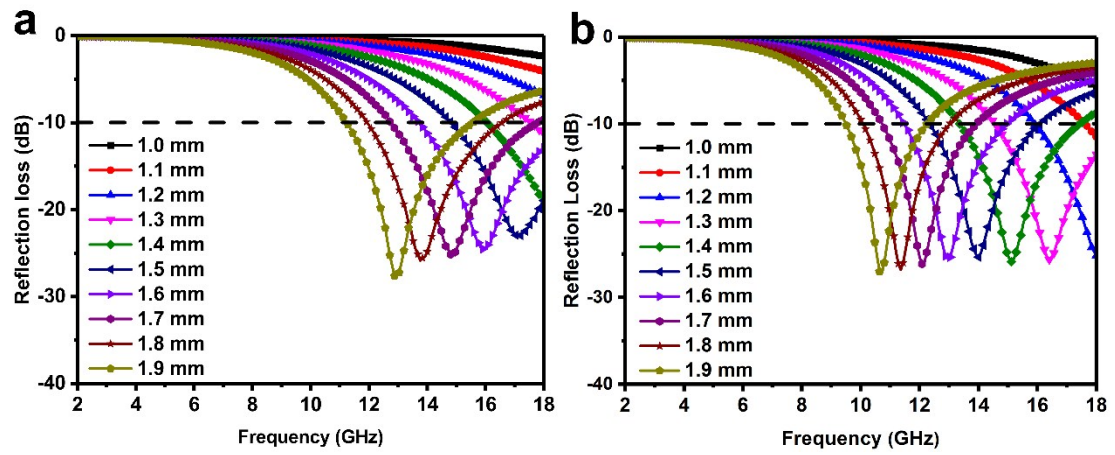

Figure S3. Reflection loss curves of (a) Co@pNGC-600, (b) Co@pNGC-700 with the thickness of 1 – 1.9 mm in the frequency range of 2 – 18 GHz.
